## CORRECTION

# Correction: SoxF factors induce Notch1 expression via direct transcriptional regulation during early arterial development.

## Development doi: 10.1242/dev.146241

Ivy Kim-Ni Chiang<sup>1,\*</sup>, Martin Fritzsche<sup>2,\*</sup>, Cathy Pichol-Thievend<sup>1</sup>, Alice Neal<sup>2</sup>, Kelly Holmes<sup>3</sup>, Anne Lagendijk<sup>1</sup>, Jeroen Overman<sup>1</sup>, Donatella D'Angelo<sup>4</sup>, Alice Omini<sup>4</sup>, Dorien Hermkens<sup>5</sup>, Emmanuelle Lesieur<sup>1</sup>, Nicolas Fossat<sup>6</sup>, Tania Radziewicz<sup>6</sup>, Ke Liu<sup>7</sup>, Indrika Ratnayaka<sup>2</sup>, Monica Corada<sup>8</sup>, George Bou-Gharios<sup>7</sup>, Patrick P. L. Tam<sup>6,9</sup>, Jason Carroll<sup>3</sup>, Elisabetta Dejana<sup>8,10</sup>, Stefan Schulte-Merker<sup>5</sup>, Benjamin M. Hogan<sup>1</sup>, Monica Beltrame<sup>4</sup>, Sarah De Val<sup>2,‡</sup> and Mathias Francois<sup>1,‡</sup>

<sup>1</sup>Institute for Molecular Bioscience, The University of Queensland, Brisbane, Queensland 4072, Australia. <sup>2</sup>Ludwig Institute for Cancer Research, Nuffield Department of Clinical Medicine, The University of Oxford, Oxford OX3 7DQ, UK. <sup>3</sup>Cancer Research UK, The University of Cambridge, Li Ka Shing Centre, Robinson Way, Cambridge CB2 0RE, UK. <sup>4</sup>Dipartimento di Bioscienze, Università degli Studi di Milano, Via Celoria 26, 20133 Milano, Italy. <sup>5</sup>University of Münster, 48149 Münster, Germany Institute for Cardiovascular Organogenesis and Regeneration, Faculty of Medicine, Westfälische Wilhelms-Universität Münster (WWU), Mendelstrasse 7, 48149 Münster and CiM Cluster of Excellence, Germany. <sup>6</sup>Embryology Unit, Children's Medical Research Institute, Westmead NSW 2145, Australia. <sup>7</sup>Institute of Aging and Chronic Disease, University of Liverpool, Liverpool L69 3GA, UK. <sup>8</sup>IFOM, FIRC Institute of Molecular Oncology, 1620139 Milan, Italy. <sup>9</sup>School of Medical Sciences, Sydney Medical School, University of Sydney, Westmead NSW 2145, Australia. <sup>10</sup>Department of Immunology Genetics and Pathology, Uppsala University, 75185 Uppsala, Sweden.

\*These authors contributed equally to this work

‡Authors for correspondence (sarah.deval@ludwig.ox.ac.uk; m.francois@imb.uq.edu.au)

There were errors published in 'SoxF factors induce Notch1 expression via direct transcriptional regulation during early arterial development' by Ivy Kim-Ni Chiang, Martin Fritzsche, Cathy Pichol-Thievend, Alice Neal, Kelly Holmes, Anne Lagendijk, Jeroen Overman, Donatella D'Angelo, Alice Omini, Dorien Hermkens, Emmanuelle Lesieur, Ke Liu, Indrika Ratnayaka, Monica Corada, George Bou-Gharios, Jason Carroll, Elisabetta Dejana, Stefan Schulte-Merker, Benjamin Hogan, Monica Beltrame, Sarah De Val and Mathias Francois (2017). *Development* **144**, 2629-2639 (doi: 10.1242/dev.146241).

The contribution of Nicolas Fossat, Tania Radziewicz and Patrick P. L. Tam was inadvertently omitted. These authors generated and validated the *Sox7* knockout mouse line used to produce the *Sox7/Sox18* double-knockout line (Fig. 9A). An explanation of how this mouse line was generated was absent from the supplementary Materials and Methods. In addition, the middle initial of Benjamin Hogan was missing.

The corrected author list and affiliations appear above. Revised Author contributions and Funding sections, as well as a revised section of the supplementary Materials and Methods that now includes generation of the *Sox7* knockout mouse line, appear below.

The authors apologise to readers for these mistakes.

### Author contributions

Conceptualization: I.K.-N.C., M.Frit., S.D.V., M.Fran.; Methodology: I.K.-N.C., M.Frit., S.D.V., M.Fran.; Formal analysis: K.H., J.C.; Investigation: I.K.-N.C., M.Frit., C.P.-T., A.N., K.H., A.L., J.O., D.D., A.O., D.H., E.L., K.L., I.R., M.C., B.M.H.; Resources: A.L., G.B.-G., J.C., S.S.-M., M.B., N.F., T.R., P.P.L.T.; Data curation: K.H., J.C.; Writing - original draft: I.K.-N.C., S.D.V., M.Fran.; Writing - review & editing: I.K.-N.C., B.M.H., M.B., S.D.V., M.Fran.; Visualization: I.K.-N.C., S.D.V., M.Fran.; Supervision: G.B.-G., J.C., E.D., B.M.H., M.B., P.P.L.T., S.D.V., M.Fran.; Project administration: S.D.V., M.Fran.; Funding acquisition: S.D.V., M.B., M.Fran.

### Funding

This work was supported by the National Health and Medical Research Council of Australia (NHMRC) (APP1107643); The Cancer Council Queensland (1107631) (M.Fran.); the Australian Research Council Discovery Project (DP140100485, M.Fran.; DP1094008, P.P.L.T.); NHMRC Senior Principal Research Fellowship (APP1003100) (P.P.L.T.); University of Sydney Postdoctoral Fellowship (N.F.); NHMRC Career Development Fellowship (APP1111169) (M.Fran.); the Ludwig Institute for Cancer Research (M.Frit., A.N., I.R., S.D.V.); the Medical Research Council (MR/J007765/1) (K.L., G.B.-G., S.D.V.); the Fondazione Cariplo (2011-0555) (M.B., B.M.H., M.Fran.); and the Biotechnology and Biological Sciences Research Council (BB/L020238/1) (A.N., K.L., G.B.-G., S.D.V.). Deposited in PMC for release after 6 months.

### Supplementary Materials and Methods

#### Generation and analysis of transgenic and mutant mice (final paragraph)

*Sox7:tml* (*Sox7*<sup>+/−</sup>) mice were generated through germline transmission in chimaeras, using VGB6 ES cells (of C57BL/6NTac background) that contained an inactivated *Sox7* allele replaced with a ZEN-Ub1 cassette from Velocigene (*Sox7*<sup>tml1(KOMP)<sup>V1cg</sup></sup>), and

obtained from the KOMP repository at University of California at Davis (<https://www.komp.org/pdf.php?projectID=VG10649>). Compound *Sox7*<sup>-/-</sup>;*Sox18*<sup>-/-</sup> mouse embryos were generated on the C57BL/6 background through crossing heterozygous *Sox7*:tm1 to *Sox18*:tm1, generating *Sox7*<sup>+/-</sup>;*Sox18*<sup>+/-</sup> mice which were subsequently inbred (Pennisi et al., 2000a). Genotype was confirmed by PCR using the following primers: mSox7(F), TGTAAGTTGGAGATCCATAGAGC; mSox7(R), TCATTCTCAGTATTGTTTTGCC; mSox7lacZ(R), TGGATCAGCTAAGCCAGGT; mSox18(F), CCCGACGTCCATCAGACCTC; mSox18(R), GTCGCTTGCGCTCGT-CCTTC; mSox18lacZ(R), CGCCCGTTGCACCACAGATG. All animals used were 7-24 weeks old.
